# Supplementary material for: UV-assisted synthesis of indium nitride nano and microstructures
Source: Royal Society of Chemistry journal article supplement (doi:10.1039/c4ta06848c), 2015-01-01
Supplement: c4ta06848c1.pdf [file c4ta06848c1.pdf]

## UV-assisted synthesis of indium nitride nano and microstructures

Mahalieo Kao,<sup>a</sup> Rudolph M Erasmus,<sup>b,d</sup> Nosipho Moloto,<sup>a</sup> Neil J  
Coville,<sup>a,b\*</sup> and Sabelo D Mhlanga<sup>b,c\*</sup>

### Supplementary Data

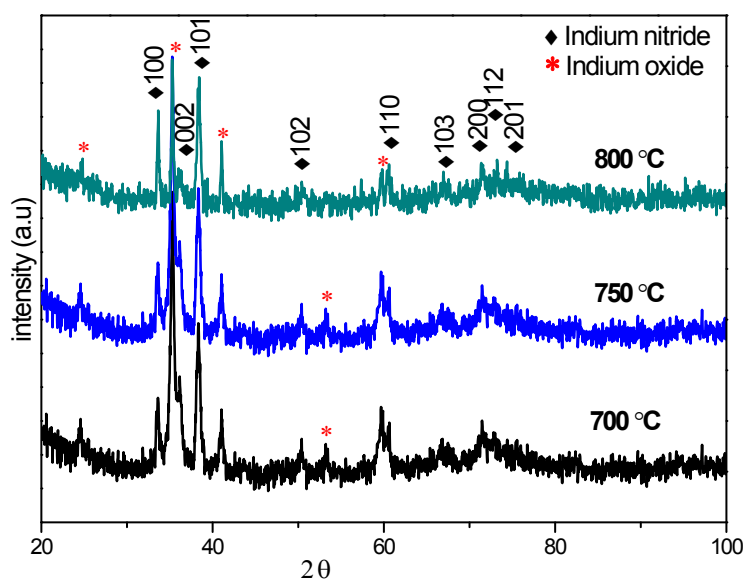

Fig.S1. XRD patterns of the as-synthesised materials after preparation at different temperatures after 6 h of photo decomposing ammonia. Peaks marked by ◆ are the hexagonal InN peak reflections, while  $\text{In}_2\text{O}_3$  reflections are marked by an asterisk.

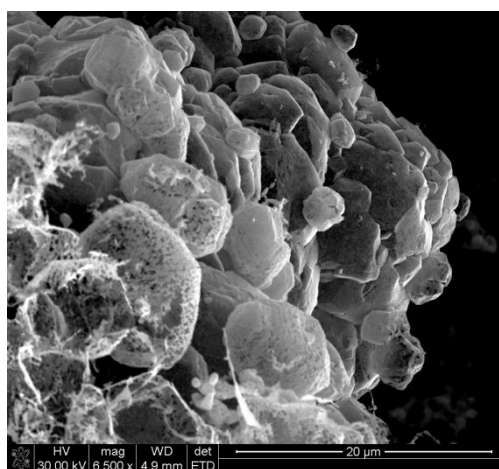

Fig.S2. The SEM image of a cluster of porous particles with hollow cores from photolysis of  $\text{In}_2\text{O}_3$  and  $\text{NH}_3$  at 700 °C.

Table S1 Synthesis parameters used to make InN

| Experiment | UV-irradiation                                     | Time (h) | Temperature (°C) | Product (TEM/SEM)                                                | XRD                                  |
|------------|----------------------------------------------------|----------|------------------|------------------------------------------------------------------|--------------------------------------|
| 1          | NH <sub>3</sub> only                               | 6        | 700              | Irregular perforated pieces                                      | InN < In <sub>2</sub> O <sub>3</sub> |
| 1          | NH <sub>3</sub> only                               | 6        | 750              | Rod-like cone stacks                                             | InN < In <sub>2</sub> O <sub>3</sub> |
| 1          | NH <sub>3</sub> only                               | 6        | 800              | Rod-like disc stacks                                             | InN < In <sub>2</sub> O <sub>3</sub> |
| 2          | In <sub>2</sub> O <sub>3</sub> and NH <sub>3</sub> | 2        | 700              | Porous particles                                                 | InN < In <sub>2</sub> O <sub>3</sub> |
| 2          | In <sub>2</sub> O <sub>3</sub> and NH <sub>3</sub> | 2        | 750              | 2D microsheets and amorphous nanowires                           | InN > In <sub>2</sub> O <sub>3</sub> |
| 2          | In <sub>2</sub> O <sub>3</sub> and NH <sub>3</sub> | 2        | 800              | InN nanotubes and In <sub>2</sub> O <sub>3</sub> particles       | InN > In <sub>2</sub> O <sub>3</sub> |
| 3          | In <sub>2</sub> O <sub>3</sub> and NH <sub>3</sub> | 0.5      | 750              | 2D microsheets with embedded rhombohedral particles              | InN < In <sub>2</sub> O <sub>3</sub> |
| 3          | In <sub>2</sub> O <sub>3</sub> and NH <sub>3</sub> | 1        | 750              | 2D microsheets with rhombohedral holes                           | InN > In <sub>2</sub> O <sub>3</sub> |
| 3          | In <sub>2</sub> O <sub>3</sub> and NH <sub>3</sub> | 3        | 750              | InN nanowires                                                    | InN                                  |
| 3          | In <sub>2</sub> O <sub>3</sub> and NH <sub>3</sub> | 4        | 750              | InN nanowires                                                    | InN                                  |
| 4          | In <sub>2</sub> O <sub>3</sub> and NH <sub>3</sub> | 0.5      | 800              | In-filled InN tubes and In <sub>2</sub> O <sub>3</sub> particles | InN < In <sub>2</sub> O <sub>3</sub> |
| 4          | In <sub>2</sub> O <sub>3</sub> and NH <sub>3</sub> | 1        | 800              | In-filled InN tubes and In <sub>2</sub> O <sub>3</sub> particles | InN > In <sub>2</sub> O <sub>3</sub> |
| 4          | In <sub>2</sub> O <sub>3</sub> and NH <sub>3</sub> | 3        | 800              | In-filled InN tubes                                              | InN                                  |
| 4          | In <sub>2</sub> O <sub>3</sub> and NH <sub>3</sub> | 4        | 800              | In-filled InN tubes                                              | InN                                  |
